# Supplementary material
Source: PubMed Central journal article supplement (PMC4393426)
Supplement: AEM.03520-14_zam999116212so1.pdf [file AEM.03520-14_zam999116212so1.pdf]

## SUPPLEMENTARY ELECTRONIC DATA

### ***Pseudomonas fluorescens* pirates both ferrioxamine and ferri-coelichelin siderophores from *Streptomyces ambofaciens***

Justine Galet<sup>1,2</sup>, Aurélie Deveau<sup>3,4</sup>, Laurence Hôtel<sup>1,2</sup>, Pascale Frey-Klett<sup>3,4</sup>, Pierre Leblond<sup>1,2</sup>,  
Bertrand Aigle<sup>1,2</sup>

<sup>1</sup>Université de Lorraine, Dynamique des Génomes et Adaptation Microbienne, UMR 1128,  
Vandœuvre-lès-Nancy, F-54506, France

<sup>2</sup>INRA, Dynamique des Génomes et Adaptation Microbienne, UMR 1128, Vandœuvre-lès-Nancy,  
F-54506, France

<sup>3</sup>INRA, Interactions Arbres-Microorganismes, UMR 1136, Champenoux, F-54280, France

<sup>4</sup>Université de Lorraine, Interactions Arbres-Microorganismes, UMR 1136, Vandœuvre-lès-Nancy,  
F-54506, France

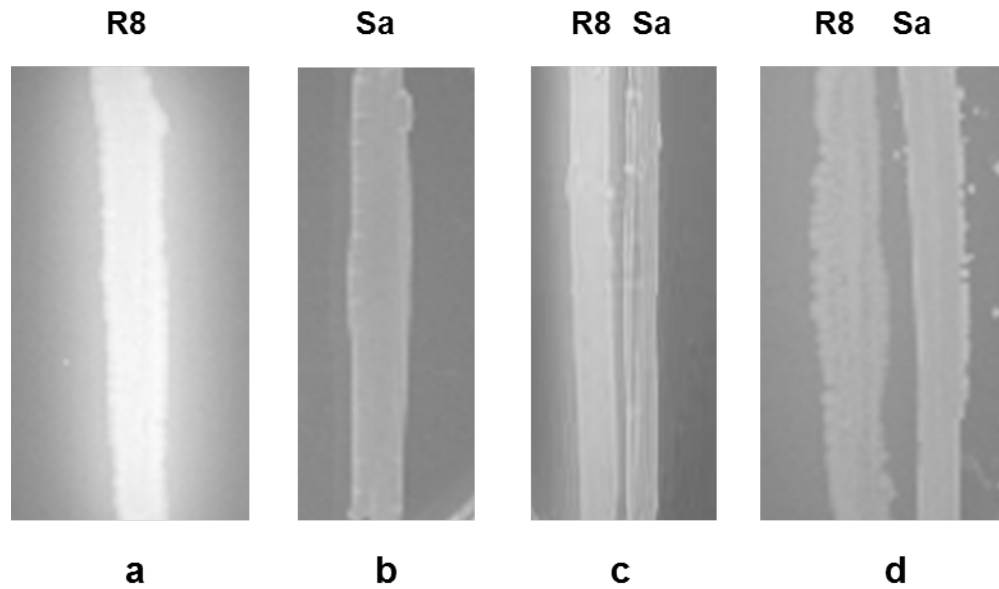

**Fig. S1** Effect of *S. ambofaciens* on the pyoverdine production by *P. fluorescens* BBc6R8 grown on 26A agar plate supplemented with 200 μM of 2,2'-bipyridyl. **a** *P. fluorescens* BBc6R8 (R8); **b** *S. ambofaciens* ATCC23877(Sa); **c** *P. fluorescens* BBc6R8 + *S. ambofaciens* ATCC23877; **d** *P. fluorescens* BBc6R8 + *S. ambofaciens* ATCC23877 which has been streaked on plate 30 h before the BBc6R8 strain. Photos were taken under UV from below the plates after a two day incubation at 26.5°C.

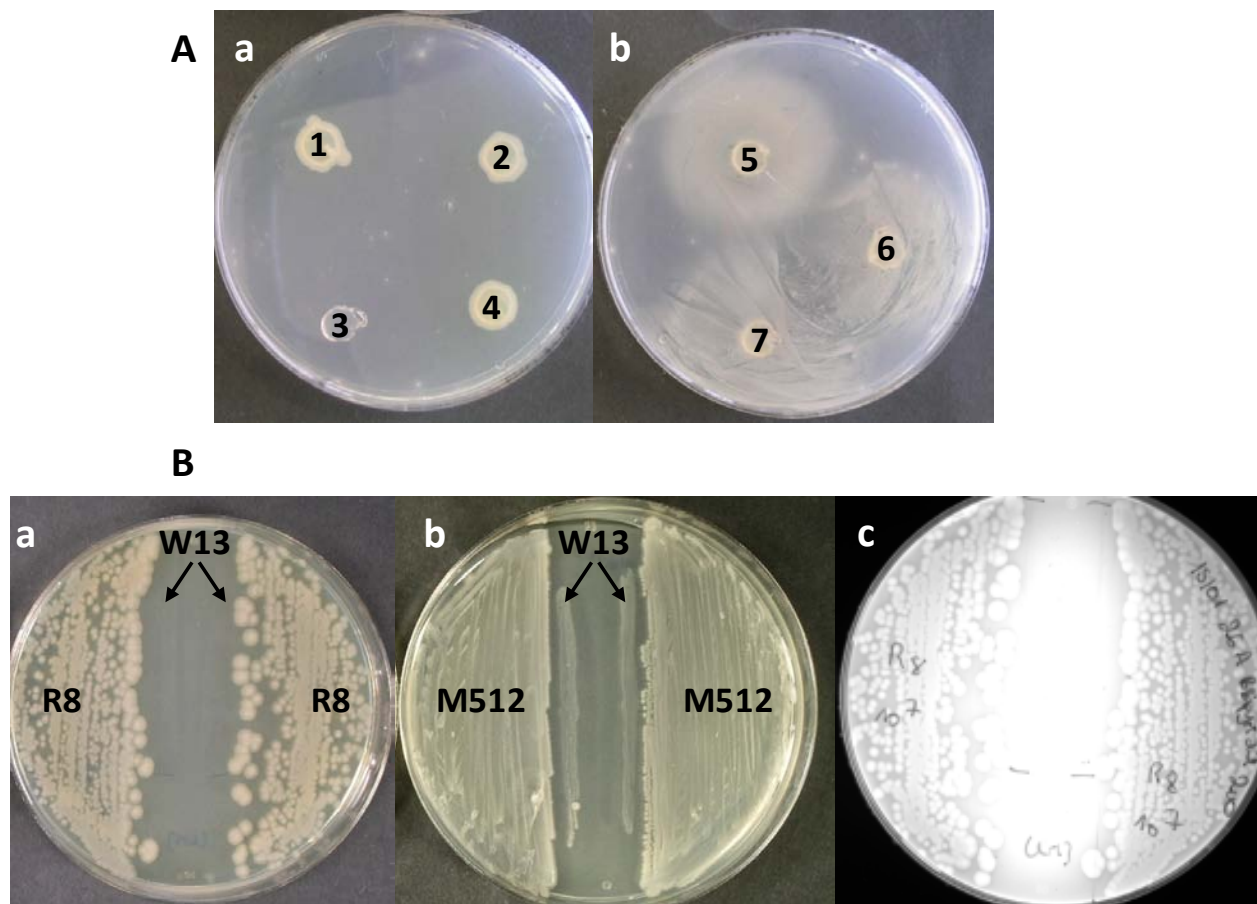

**Fig.S2** Extracellular complementation of the *S. coelicolor*  $\Delta des\Delta cch$  mutant by exogenous siderophores. **A.** *S. coelicolor*  $\Delta des\Delta cch$  (strain W13) was grown for 3 days on 26A agar plate supplemented with 200  $\mu$ M of 2,2'-bipyridyl in presence of plugs from a 3 days culture of *P. fluorescens* BBc6R8 (**a**) or *S. coelicolor* M512 (**b**) grown at 26.5°C on 26A plate without iron chelator (1 and 5) or with 2,2'-bipyridyl at 100  $\mu$ M (2 and 6) or 200  $\mu$ M (4 and 7). The plug 3 in (**a**) correspond to a plug from a non-inoculated 26A agar plate supplemented with 200  $\mu$ M of 2,2'-bipyridyl. **B.** *S. coelicolor*  $\Delta des\Delta cch$  (strain W13) was streaked on 26A solid medium supplemented with 200  $\mu$ M of 2,2'-bipyridyl 3 days after *P. fluorescens* BBc6R8 (**a**) or the *S. coelicolor* M512 (**b**) strain; **c**, the plate shown in **a** was exposed under UV and photo was taken from below the plate. The fluorescence indicates the presence of pyoverdine. **a** to **c**, photos were taken two days after the inoculation with W13. All cultures were carried out at 26.5°C.

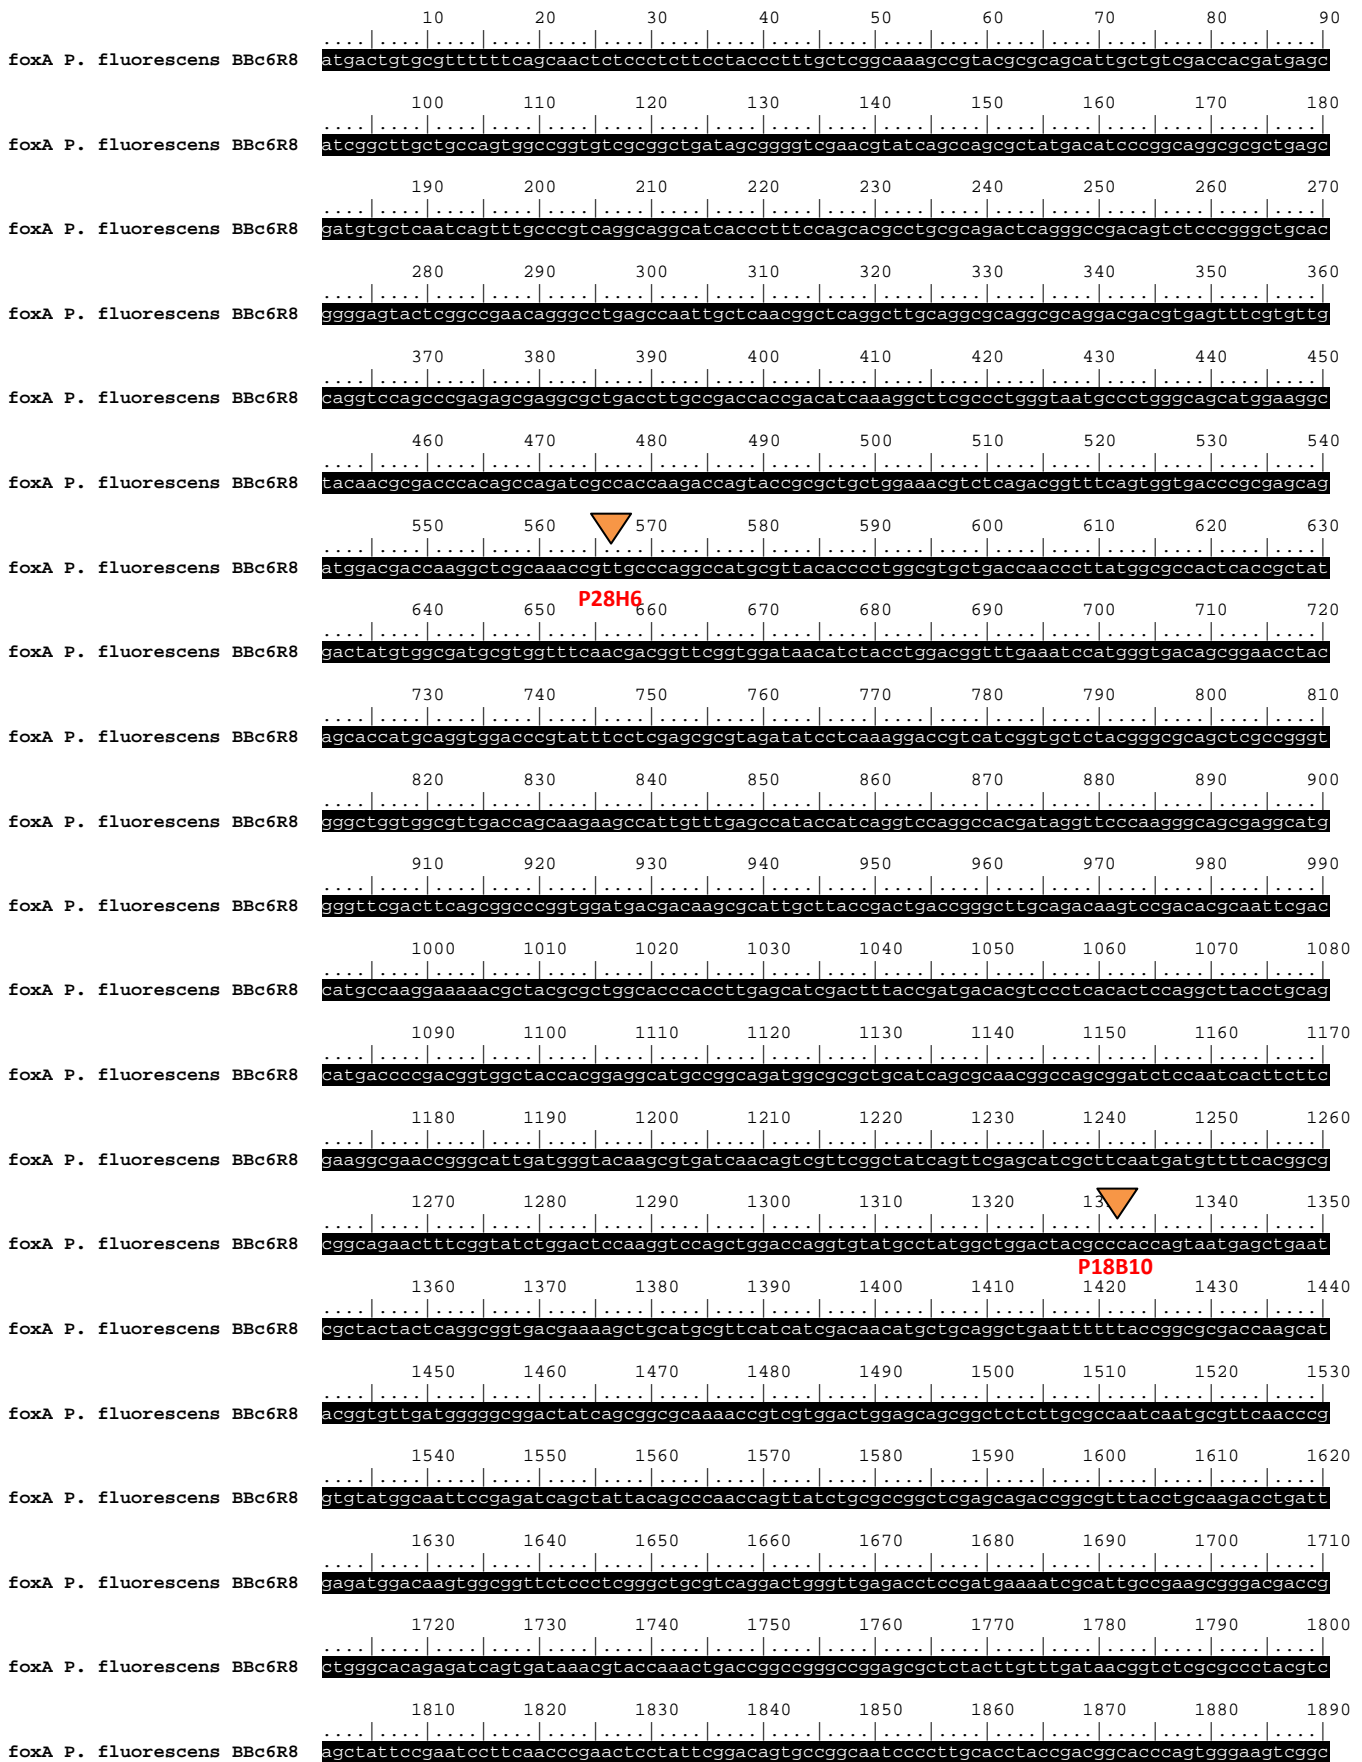

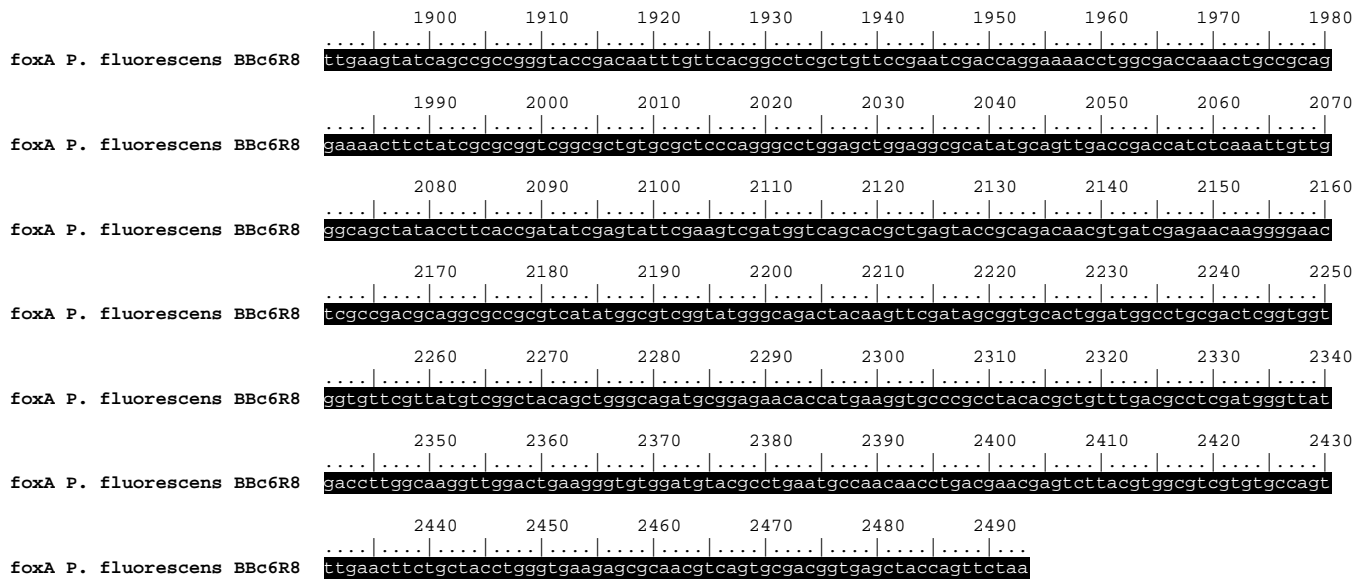

**Fig. S3** Sequence of the *P. fluorescens* BBc6R8 *foxA* gene and location of the insertion site of the Tn5 transposon in the P28H6 and P18B10 mutants.

```

      10      20      30      40      50      60      70      80
FoxA P. fluorescensBBc6R8  -----MTVRFFFSNSP--SSYPLLGKAVRAALLSTTMSIGLLEVAGVAADSGVERISQRYDTPAGALSDVLNQFARQAGIT
FoxA P. fluorescens pf0-1  -----MLPGLSMAAN-ASEVSSHRYNTAAGPLGEALNQFARQAGIT
FoxA P. protegens pf-5    -----MTLRDTRPSS--PCARPLCOAIRAALLCSSIGLGTVAPQVLAAASAVDAPRHSYSVAPGNLGDALNQFARQAGIT
FoxA P. aeruginosa PAO1  MTATAVVLRNAPSSLDFPRASRLSRSVRAALLSLAMAACAALLCASAAEAAAEQARP-YATPAGQLGDVLNRFARBAGIT

      90      100     110     120     130     140     150     160
FoxA P. fluorescensBBc6R8  LSSTPAQTQGRQSPGLHGEYSAEQGLSQLLNSGSLQAAQDDVSVFLVQVQESEALILPTTDIKGFALGNALGSMBGYNA
FoxA P. fluorescens pf0-1  LSMTPQOTQGRQSPGVQGEYSTDASHLLCGSGLEAVSQDGSSVYLRSVAETEALALPTDIKGFALGNALGSMBGYNA
FoxA P. protegens pf-5    LSTTPALTQGRQSPGLQGDYSIPQGLNQLLRCGSLEAVSQDGGSVYLRPLEQSALILPPATEVKGFALGNALGSMBGYNA
FoxA P. aeruginosa PAO1  LSATPAQTQGVYSQGLRGSFTVQGLARLLADTPLEAEDQDGGSFVLREAPAKDGDVLNMQAVEVFALGNILGSTDCYLA

      170     180     190     200     210     220     230     240
FoxA P. fluorescensBBc6R8  THSQIATKTSTALLETSQITVSVVTREQMDDQSQTVAQAMRYTPGVLTNPYGATHRYDYVAMRGFNDGSVDNIYLDGLKS
FoxA P. fluorescens pf0-1  THSQIATKTSTALLETSQSSVSVVTREQMDDQSQTVAQAMRYTPGVLTNPYGATHRYDYVAMRGFNDGSVDNIYLDGLKS
FoxA P. protegens pf-5    THSQIATKTSTALLETSQSSVSVVTREQMDDQGAQTVAQTMRYTPGVLTNPYGATHRYDYVAMRGFNDGSVDNIYLDGLKS
FoxA P. aeruginosa PAO1  THSQIATKTSKPLLETSQITVSVITREQIDDTASKTVQAMRYTPGLETGQVCASNRYDVYVMRGFLNSVDNIYLDGLKFA

      250     260     270     280     290     300     310     320
FoxA P. fluorescensBBc6R8  MGDSGTYSTMQVDPYFLERVDILKGPSSVLYGRSSPGGLVALTSSKPLYEPHQVQATIGSQQQRCMGFDFSGPVDDDKR
FoxA P. fluorescens pf0-1  MGDSGTYSTMQVDPYFLERVDILKGPSSVLYGRSSPGGLVALTSSKPLYEPHQVQATIGSQQQRCMGFDFSGPVDDDKR
FoxA P. protegens pf-5    MGDSGTYSSMQVDPYFLERVDILKGPSSVLYGRSSPGGLVALTSSKPLYEPHQVQATIGSQQQRCMGFDFSGPVDDDKH
FoxA P. aeruginosa PAO1  MGDSGTFSSMQVDPYFLERDILKGPSSVLYGRSLPGGLVALTSSKPLYEDYRQITGSICNMGQKEMGFDSGPVDDEKR

      330     340     350     360     370     380     390     400
FoxA P. fluorescensBBc6R8  IAYRLIGLADKSDTQFDHAKEKRYALAPTLSIDFTDTSLTLQAYLQHDPDGGYHGGMPADGALHQRNGORISNHFFEGE
FoxA P. fluorescens pf0-1  IAYRLIGLTDQSDTQFDHNKEKRFALAPTVSIDFNBDTSLTLQAYLQHDPDGGYHGGVPADGTLHQRNGNRISPHFFEGE
FoxA P. protegens pf-5    IAYRLIGLTDKSDTQFDHAKEKRFALSPTLSIDFSEDTSLTLQAYLQNDPDGGYHGGMPANGTLNORNGORISEHFFEGE
FoxA P. aeruginosa PAO1  IAYRLIGLGKSDTQFDHVKERYALAPTLAIDFSDDTLTLQGYLQHDPDGGYHGGVPADGTLSHHNGRISREFFDGE

      410     420     430     440     450     460     470     480
FoxA P. fluorescensBBc6R8  PGIDGYKRDQSFGYQEHRFNDVFTARQNFRYLDSKVQLDQVYAYGWTTPSTSNELNRYYSGGDEKLHAFIDNMLQAEF
FoxA P. fluorescens pf0-1  PGIDGYSRDQSFGYQEHRFNDVFTARQNFRYLDSKVNMDQVYAYGWTSPTSNELNRYTGGDERLHAFIVDNMLQAEF
FoxA P. protegens pf-5    PGVDGYKRDQSFGYQEHRFNDTFTARQNFRYLDSKVKLDQVYAYGWTNATSNDLNRYYSGGGEKLHSFIVDNMLQAEF
FoxA P. aeruginosa PAO1  PSKDDFDRTQRMFGYQEHRTDDVSARQNFRYLDSDVDLSOVYAYGWSASEPNKLNRYFSGAREHLQAIVDNMLQAEF

      490     500     510     520     530     540     550     560
FoxA P. fluorescensBBc6R8  FTGATKHTVLMGADYQRRKTVVDWSSGSLAPINAFNPVYGNSEISYYSPTSYLRRLEQTGVYLQDLIEMDKWRFSLGLRQ
FoxA P. fluorescens pf0-1  FTGATKHTVLMGADYQRRKTVVDWTSGGLAPINAFNPESGNSAITPYGETSYLRRLEQTGVYLQDLIEMNKWRFSLGLRQ
FoxA P. protegens pf-5    LTGDVKHTLLMGADYQRRKTVVDWDQGTLQPINAFNPVYGNSTINYSHTSYLRRLEQTGVYLQDLIELDKWRFSLGLRQ
FoxA P. aeruginosa PAO1  ATGAARHTLLLGLDYQRRRTVVDWSSGSASALDAFNPVYGDDAISYFPDDNHTRRLEQTGVYLQDLIDIDQWRFSLGLRQ

      570     580     590     600     610     620     630     640
FoxA P. fluorescensBBc6R8  DWVETSDENRLAEAGRPLGTEISDKRTKLTGRAGALYLFDNGLAPVVSYSESFNPNSYSDSAGNPLAPTDGTQWEVGLKY
FoxA P. fluorescens pf0-1  DWVETSDENRLAEAGRPVGTEINDRRTKLTGRAGALYLFDNGLAPVVSYSESFNPNSYADSAGNPLAPTDGTQWEMGLKY
FoxA P. protegens pf-5    DWVETSDENRLAEAQRPLGTEISDKRTKLTGRAGALYLFDNGLAPVVSYSESFNPNSYADSAGNPLPTDGTQWEVGLKY
FoxA P. aeruginosa PAO1  DWVSVTDKN-----RSTGSKADDWEKFTGRIGALYLFDNGLAPVVSYSESFNPNAYSASGTPLAPTECKQWEVGLKF

      650     660     670     680     690     700     710     720
FoxA P. fluorescensBBc6R8  QPPGTDNLFTASLFRIDQENLATKLQENFYRAVGAVRSQGLEAHMQLTDHLKLGSYTFTDIBYSKSMVSTLSTADN
FoxA P. fluorescens pf0-1  QPPGTDNLFTASLFRIDQENLATKLQENFYRAVGAVRSQGLEAHMQLTDNLKVLGSYTFTDIBYSKSMVSTLSTPTN
FoxA P. protegens pf-5    QPPGTDNLFTASLFRIDQENLASKLQENFYRAVGAVRSQGLEAHMQLTDNLKLSYTFTDIQSKSMVSTLSATN
FoxA P. aeruginosa PAO1  QAPGSNSFYTASLFHLIQENVASKEPQDNFYTSVGEVRSQGLEAHTQLSDNLKLGSYTYTDIYTKSLDG-----

      730     740     750     760     770     780     790     800
FoxA P. fluorescensBBc6R8  VLENKGNSPTQAPRHMASVWADYKFDSALDGLRLGGGVRVGYSWADAENTMKVPAYTLFDASMGYDLGKVGLKGVDVR
FoxA P. fluorescens pf0-1  VLENKGNSPTQAPRHMASLWADYKFDSAALDGLRLGGGVRVGYSWADAENTMKVPSYTLFDASIGYDLGKVGLKGVDVR
FoxA P. protegens pf-5    LLENKGNSPTQAPRQMASLWADYKFDSATLDGLRLGGGVRVGYSWADAENTMKVPAYTLFDASIGYDLGKLGLKGVDVR
FoxA P. aeruginosa PAO1  ---NQCHTPNQAPKHMASLWADYAFDAGLLSGLSIGGGARYVGETWADKENTLRVDYTLDARIGYDLGKLGLKGVDVS

```

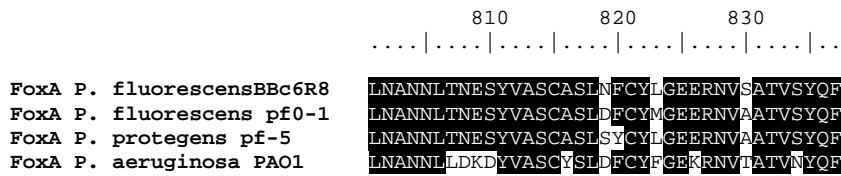

**Fig.S4** Sequence alignment of the *P. fluorescens* BBc6R8 TonB-dependent receptor FoxA with the FoxA proteins of *P. fluorescens* Pf0-1, *P. protegens* Pf-5 and *P. aeruginosa* PAO1.

The aa residues conserved in at least 3/4 of the proteins are shaded in black.

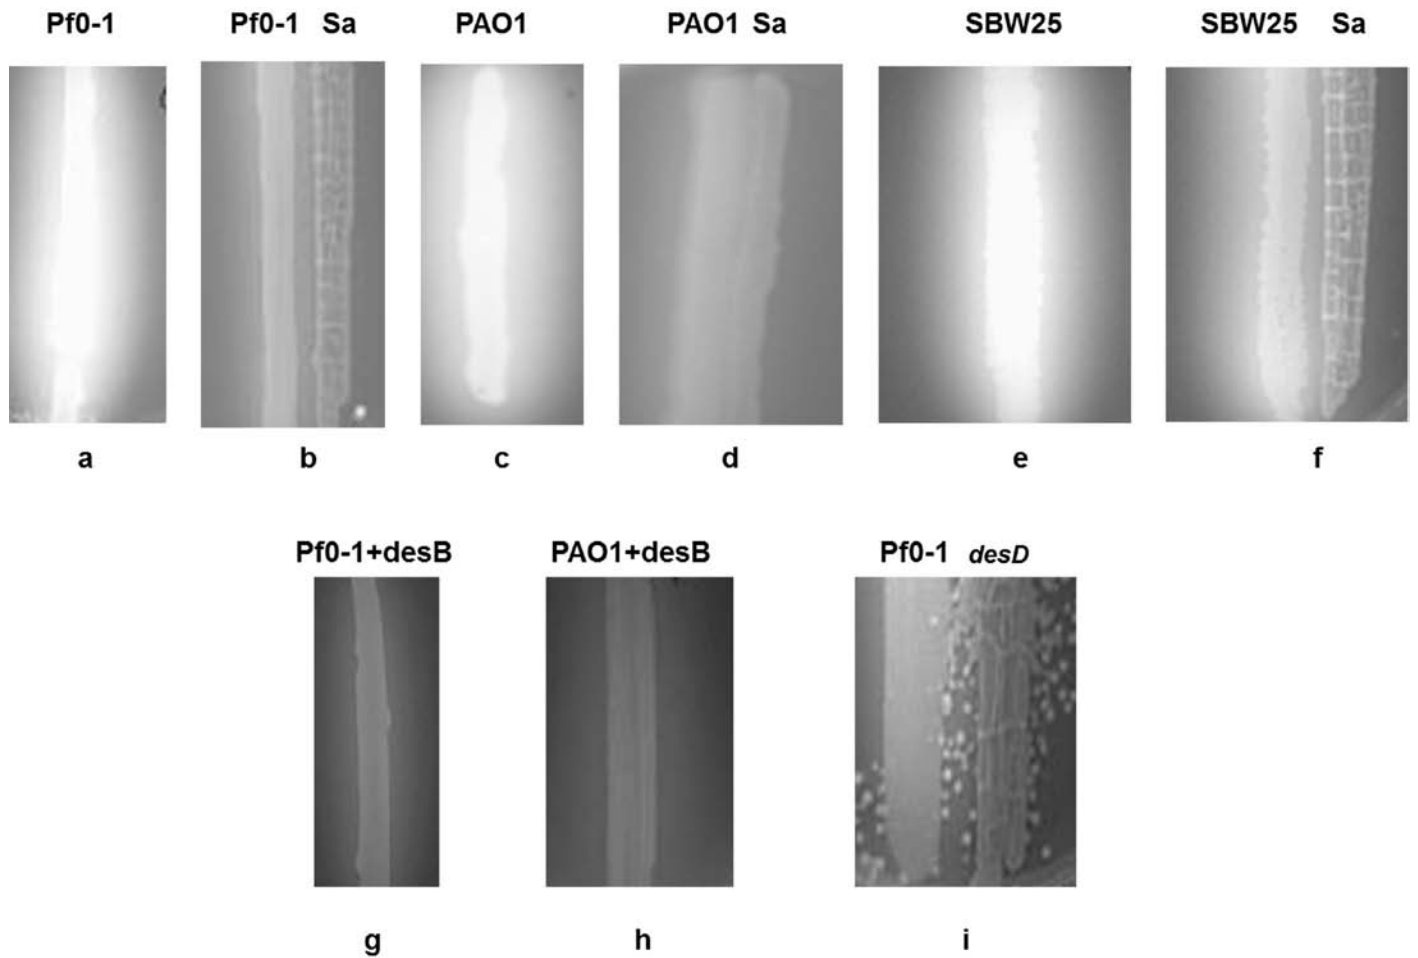

**Fig.S5** Effect of *S. ambofaciens* ATCC23877 on the pyoverdine production by *P. fluorescens* Pf0-1, *P. fluorescens* SBW25 and *P. aeruginosa* PAO1 grown on 26A agar medium. **a** *P. fluorescens* Pf0-1; **b** *P. fluorescens* Pf0-1 + *S. ambofaciens* ATCC23877 (Sa); **c** *P. aeruginosa* PAO1; **d** *P. aeruginosa* PAO1 + *S. ambofaciens* ATCC23877; **e** *P. fluorescens* SBW25; **f** *P. fluorescens* SBW25 + *S. ambofaciens* ATCC23877; **g** and **h** *P. fluorescens* Pf0-1 and *P. aeruginosa* PAO1 cultivated in presence of 200  $\mu$ M of desferrioxamine B mesylate; **i** *P. fluorescens* Pf0-1 + *S. coelicolor* M512 *desD*. The *Streptomyces* strains were streaked on plate 30 h before the *Pseudomonas* strains. Photos were taken under UV from below the plates after a two day (co-)culture at 26.5°C.



**Table S1** Potential function encoded by the genes analyzed by RT-qPCR based on their conservation with their homologues in *P. aeruginosa* PAO1

| Gene names   | <i>P. fluorescens</i> BBC6R8 genome locus | Potential function                                       | % of identity with <i>P. aeruginosa</i> PAO1 homologues at the amino acid level |
|--------------|-------------------------------------------|----------------------------------------------------------|---------------------------------------------------------------------------------|
| <i>pvdD</i>  | MHB_002071                                | NRPS pyoverdine biosynthesis                             | 49.6%                                                                           |
| <i>pvdE</i>  | MHB_002068                                | ABC export system fused ATPase and permease components   | 73.2%                                                                           |
| <i>pvdO</i>  | MHB_002067                                | pyoverdine responsive serine/threonine kinase            | 73.4%                                                                           |
| <i>pvdQ</i>  | MHB_000555                                | acyl-homoserine lactone acylase                          | 55.2%                                                                           |
| <i>pvdS</i>  | MHB_005722                                | sigma factor controlling pyoverdine synthesis            | 90.7 %                                                                          |
| <i>phcF</i>  | MHB_01018                                 | NRPS adenylation domain, enantio-pyochelein biosynthesis | 40.6 %                                                                          |
| <i>foxA</i>  | MHB_05767                                 | TonB-dependent receptor of ferrioxamines                 | 66.6 %                                                                          |
| <i>foxR</i>  | MHB_05768                                 | anti-sigma factor                                        | 57.3 %                                                                          |
| <i>foxI</i>  | MHB_05769                                 | sigma factor                                             | 75.3 %                                                                          |
| <i>pepSY</i> | MHB_001025                                | PepSY- associated TM helix protein                       | 35 %                                                                            |
| <i>fur</i>   | MHB_006398                                | Transcriptionnal repressor                               | 82,4%                                                                           |
